# Supplementary figures and images for: Therapeutic vulnerabilities in the DNA damage response for the treatment of ATRX mutant neuroblastoma
Source: PubMed Central journal article supplement — eBioMedicine. 2020 Aug 23;59:102971. doi: 10.1016/j.ebiom.2020.102971 (PMC7452577; doi:10.1016/j.ebiom.2020.102971), 2020-08-23

Fig 1A

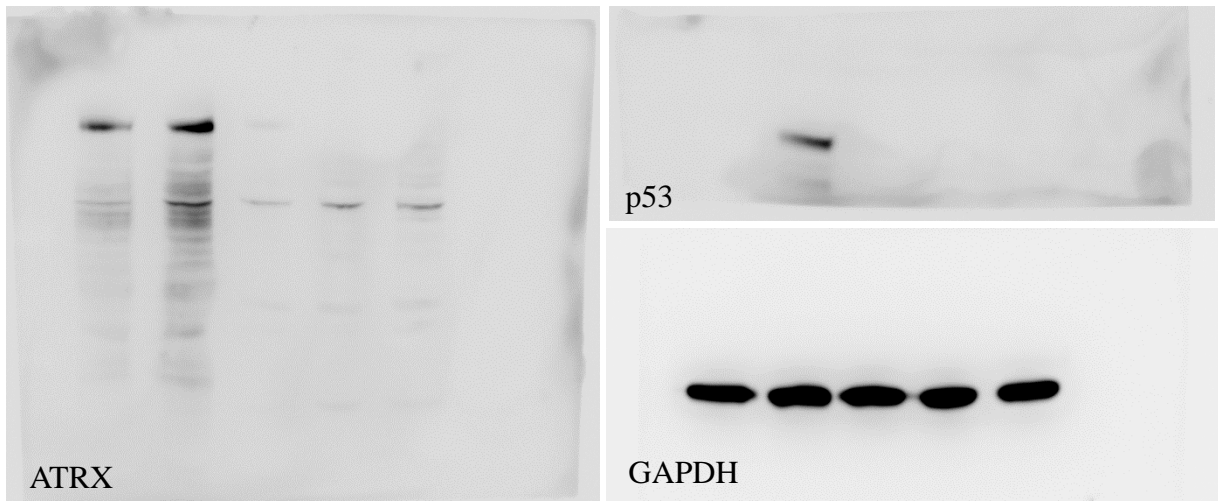

Fig 3D

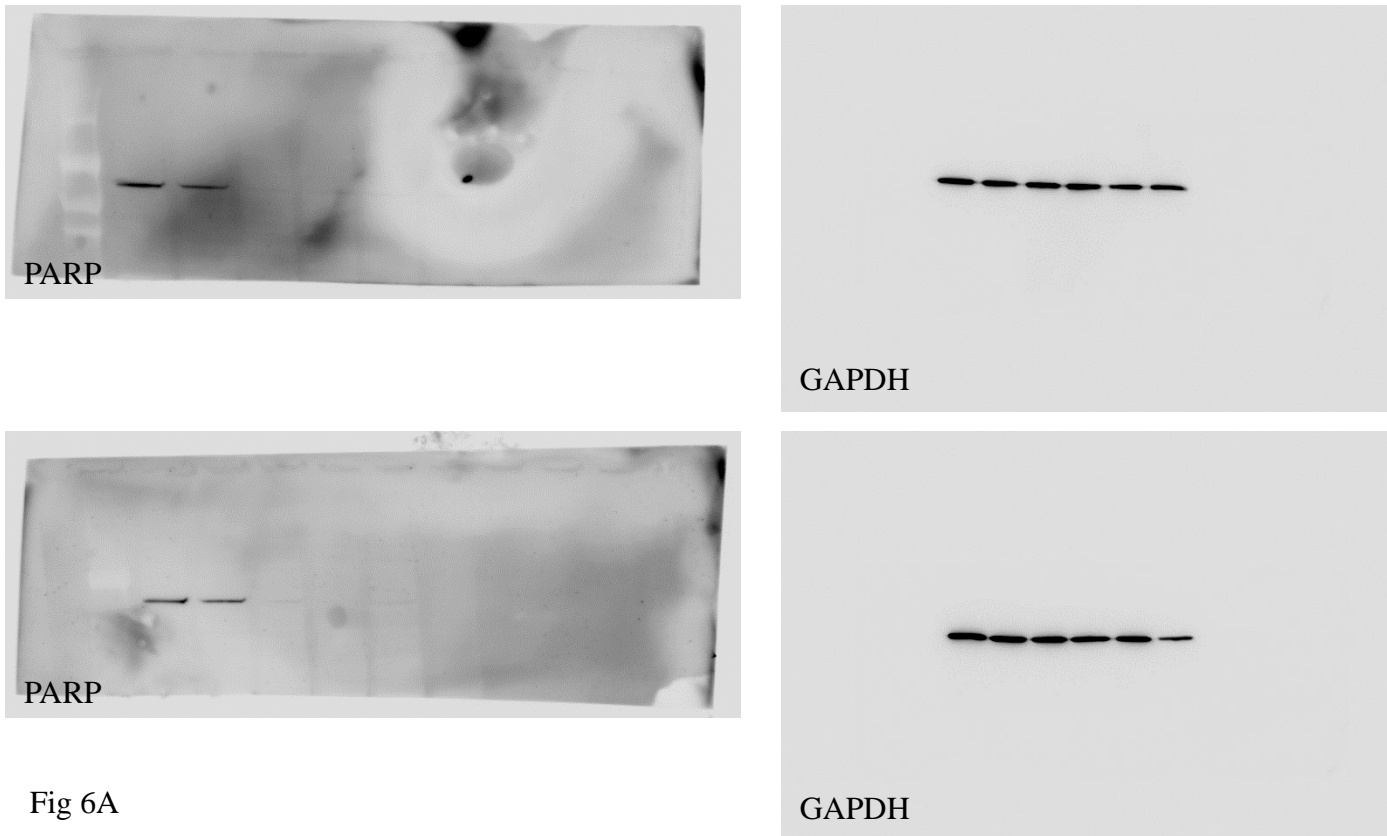

Fig 6A

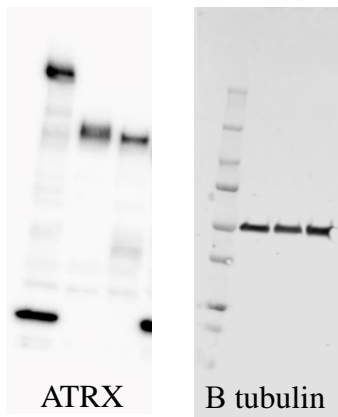

Supplement: mmc5.pdf [file mmc5.pdf]
